# Supplementary material
Source: Elsevier journal article supplement (https://www.sciencedirect.com/science/article/pii/S2255553619300151)
Supplement: mmc1 [file S2255553619300151:mmc1.docx]

**JPED_2018-546 – Material Suplementar**

**Dados suplementares**

**Tabela S1 - Resultados dos modelos de regressão polinomial relacionando a pressão arterial com o escore z de idade e estatura em crianças sem sobrepeso na base de dados ERICA**

|  | **Pressão Arterial Sistólica** | | | | **Pressão Arterial Diastólica** | | | |
| --- | --- | --- | --- | --- | --- | --- | --- | --- |
|  | **Meninas** | | **Meninos** | | **Meninas** | | **Meninos** | |
| **Parâmetro** | **coeficiente de regressão β** | ***p-valor*** | **coeficiente de regressão β** | ***p-valor*** | **coeficiente de regressão β** | ***p-valor*** | **coeficiente de regressão β** | ***p-valor*** |
| **Intercepto** | 106,963 | < 0,001 | 113,265 | < 0,001 | 65,983 | < 0,001 | 64,722 | < 0,001 |
| **Idade - 15** | 0,914 | 0,004 | 3,630 | < 0,001 | 0,959 | < 0,001 | 1,448 | < 0,001 |
| **(Idade - 15)2** | -0,213 | 0,335 | -0,942 | < 0,001 | -0,242 | 0,091 | -0,099 | 0,486 |
| **(Idade - 15)3** | 0,041 | 0,342 | -0,046 | 0,229 | -0,020 | 0,589 | -0,051 | 0,094 |
| **(Idade - 15)4** | -0,009 | 0,755 | 0,086 | 0,001 | 0,018 | 0,339 | 0,008 | 0,665 |
| **ZE** | 1,632 | < 0,001 | 3,073 | 0,000 | 1,094 | < 0,001 | 1,206 | < 0,001 |
| **ZE2** | 0,124 | 0,665 | -0,026 | 0,884 | 0,206 | 0,282 | -0,015 | 0,910 |
| **ZE3** | 0,037 | 0,646 | -0,039 | 0,448 | 0,006 | 0,936 | -0,017 | 0,660 |
| **ZE4** | -0,001 | 0,982 | 0,006 | 0,773 | -0,013 | 0,517 | 0,010 | 0,531 |
| **Desvio padrão residual** | 9,378 |  | 10,220 |  | 7,408 |  | 7,810 |  |

ZE, escore z da estatura.

**Tabela S2 - Distribuição da amostra ERICA pelas variáveis selecionadas**

| **Variável** | **Global** | **Sem sobrepeso** | **Sobrepeso** |
| --- | --- | --- | --- |
| **Distribuição de amostras** | 100 | 74,5 (73,3-75,6) | 25,5 (24,4-26,6) |
| **Sexo feminino** | 49,8 | 50,0 (49,3-50,6) | 49,1 (47,2-51,0) |
| **Distribuição por idade** |  |  |  |
| **12 anos** | 17,6 (17,6-17,7) | 16,4 (16,0-16,9) | 21,1 (19,9-22,3) |
| **13 anos** | 17,5 (17,4-17,5) | 16,8 (16,4-17,3) | 19,4 (18,2-20,6) |
| **14 anos** | 17,6 (17,6-17,6) | 17,7 (17,3-18,0) | 17,4 (16,5-18,3) |
| **15 anos** | 17,4 (17,4-17,4) | 18,0 (17,7-18,3) | 15,6 (14,7-16,5) |
| **16 anos** | 16,1 (16,1-16,2) | 17,0 (16,5-17,4) | 13,8 (12,6-15,0) |
| **17 anos** | 13,7 (13,7-13,8) | 14,1 (13,8-14,4) | 12,8 (12,0-13,7) |
| **Cor da pele** |  |  |  |
| **Branca** | 39,1 (37,5-40,8) | 37,8 (36,1-39,5) | 42,4 (40,2-44,7) |
| **Preta** | 7,8 (7,2-8,5) | 8,0 (7,4-8,8) | 7,6 (6,6-8,8) |
| **Parda** | 47,7 (46,3-49,1) | 48,8 (47,4-50,1) | 44,5 (42,2-46,7) |
| **Amarela** | 2,0 (1,8-2,3) | 2,2 (1,9-2,5) | 1,7 (1,3-2,1) |
| **Nativa Brasileira** | 0,7 (0,5-0,8) | 0,7 (0,5-0,8) | 0,7 (0,4-0,9) |
| **Não declarado** | 2,6 (2,3-2,9) | 2,5 (2,2-2,8) | 3,1 (2,3-4,2) |
| **Escola pública** | 82,3 (77,6-86,2) | 84,2 (79,9-87,7) | 77,6 (71,8-82,4) |
| **Etilismo** | 22,2 (21,1-23,2) | 22,2 (21,1-23,3) | 22,1 (20,5-23,9) |
| **Fisicamente inativo** | 54,3 (53,3-55,3) | 54,8 (53,7-55,8) | 52,8 (51,3-54,4) |
| **Tabagismo** | 2,4 (2,1-2,8) | 2,6 (2,2-2,9) | 2,2 (1,8-2,7) |
| **Estatura (m)** | 1,63 (1,62-1,63) | 1,62 (1,62-1,63) | 1,64 (1,63-1,64) |
| **Peso (kg)** | 56,2 (55,9-56,5) | 51,1 (50,9-51,3) | 71,2 (70,7-71,6) |
| **IMC (kg/m2)** | 21,1 (21,0-21,2) | 19,3 (19,2-19,3) | 26,4 (26,3-26,5) |
| **CC (cm)** | 71,5 (71,2-71,7) | 67,4 (67,3-67,6) | 83,3 (82,9-83,7) |
| **PASa (mmHg)** | 11,8 (110,5-111,1) | 108,6 (108,3-109,0) | 117,1 (116,7-117,6) |
| **PADb (mmHg)** | 65,9 (65,6-66,1) | 64,9 (64,6-65,2) | 68,7 (68,3-69,0) |
| **Frequência cardíaca (bpm)** | 81,4 (80,9-81,8) | 81,3 (80,8-81,8) | 81,5 (81,0-82,1) |

Valores dados como proporção (IC95%) ou média (IC95%).

IMC, índice de massa corporal; CC, circunferência da cintura.

a Média da segunda e terceira medidas da pressão arterial sistólica.

b Média da segunda e terceira medidas da pressão arterial diastólica.
